# Supplementary material for: Substitution chemistry of MM quadruply bonded complexes (M = Mo or W) supported by the anion of 2-hydroxy-6-methylpyridine
Source: Royal Society of Chemistry journal article supplement (doi:10.1039/b618957a), 2007-01-01
Supplement: b618957a.pdf [file b618957a.pdf]

**Table C.1.** Crystal data and structure refinement for  $[cis-Mo_2(mhp)_2(CH_3CN)_4]^{2+}(BF_4^-)_2$  (**1**)

File: Chisholm 1449.

|                                   |                                                                                                                                          |          |
|-----------------------------------|------------------------------------------------------------------------------------------------------------------------------------------|----------|
| Empirical formula                 | C <sub>22</sub> H <sub>24</sub> Mo <sub>2</sub> N <sub>6</sub> O <sub>2</sub> , 2(C <sub>2</sub> H <sub>3</sub> N), 2(B F <sub>4</sub> ) |          |
| Formula weight                    | 828.06                                                                                                                                   |          |
| Temperature                       | 150(2) K                                                                                                                                 |          |
| Wavelength                        | 0.71073 Å                                                                                                                                |          |
| Crystal system                    | Orthorhombic                                                                                                                             |          |
| Space group                       | P2 <sub>1</sub> nm                                                                                                                       |          |
| Unit cell dimensions              | a = 7.26150(10) Å                                                                                                                        | α = 90°. |
|                                   | b = 12.0539(2) Å                                                                                                                         | β = 90°. |
|                                   | c = 19.1113(3) Å                                                                                                                         | γ = 90°. |
| Volume                            | 1672.9(4) Å <sup>3</sup>                                                                                                                 |          |
| Z                                 | 2                                                                                                                                        |          |
| Density (calculated)              | 1.644 Mg/m <sup>3</sup>                                                                                                                  |          |
| Absorption coefficient            | 0.830 mm <sup>-1</sup>                                                                                                                   |          |
| F(000)                            | 824                                                                                                                                      |          |
| Crystal size                      | 0.04 x 0.08 x 0.38 mm <sup>3</sup>                                                                                                       |          |
| Theta range for data collection   | 3.28 to 27.49°.                                                                                                                          |          |
| Index ranges                      | -9 ≤ h ≤ 9, 0 ≤ k ≤ 15, 0 ≤ l ≤ 24                                                                                                       |          |
| Reflections collected             | 19161                                                                                                                                    |          |
| Independent reflections           | 3950 [R(int) = 0.0336]                                                                                                                   |          |
| Completeness to theta = 27.49°    | 99.7 %                                                                                                                                   |          |
| Refinement method                 | Full-matrix least-squares on F <sup>2</sup>                                                                                              |          |
| Data / restraints / parameters    | 3950 / 1 / 221                                                                                                                           |          |
| Goodness-of-fit on F <sup>2</sup> | 1.034                                                                                                                                    |          |
| Final R indices [I > 2σ(I)]       | R1 = 0.0282, wR2 = 0.0671                                                                                                                |          |
| R indices (all data)              | R1 = 0.0324, wR2 = 0.0687                                                                                                                |          |
| Absolute structure parameter      | 0.02(4)                                                                                                                                  |          |
| Largest diff. peak and hole       | 0.544 and -0.381 e.Å <sup>-3</sup>                                                                                                       |          |

**Table C.2.** Atomic coordinates ( $\times 10^4$ ) and equivalent isotropic displacement parameters ( $\text{\AA}^2 \times 10^3$ ) for Chisholm 1449.  $U(\text{eq})$  is defined as one third of the trace of the orthogonalized  $U^{ij}$  tensor.

|       | x        | y       | z       | U(eq)  |
|-------|----------|---------|---------|--------|
| Mo(1) | 867(1)   | 3500(1) | 0       | 17(1)  |
| Mo(2) | -1482(1) | 2450(1) | 0       | 18(1)  |
| N(1)  | -307(3)  | 4476(2) | 837(1)  | 20(1)  |
| N(2)  | -718(4)  | 1208(2) | 769(1)  | 25(1)  |
| N(3)  | 2598(4)  | 2748(2) | 787(1)  | 22(1)  |
| O(1)  | -2789(3) | 3327(2) | 763(1)  | 23(1)  |
| C(1)  | 2467(5)  | 5650(3) | 934(2)  | 40(1)  |
| C(2)  | 567(4)   | 5337(3) | 1174(2) | 25(1)  |
| C(3)  | -261(5)  | 5902(3) | 1713(2) | 32(1)  |
| C(4)  | -2022(5) | 5606(3) | 1933(2) | 34(1)  |
| C(5)  | -2896(5) | 4727(3) | 1617(2) | 29(1)  |
| C(6)  | -2013(4) | 4166(2) | 1068(2) | 21(1)  |
| C(7)  | -552(5)  | 473(3)  | 1136(2) | 28(1)  |
| C(8)  | -381(6)  | -484(3) | 1602(2) | 44(1)  |
| C(9)  | 3514(5)  | 2379(2) | 1205(1) | 23(1)  |
| C(10) | 4671(5)  | 1867(3) | 1732(2) | 29(1)  |
| B(1)  | 9701(6)  | 1770(3) | 3001(2) | 35(1)  |
| F(1)  | 10953(5) | 1751(3) | 2480(2) | 81(1)  |
| F(3)  | 10374(5) | 2293(2) | 3580(2) | 69(1)  |
| F(2)  | 9295(7)  | 705(2)  | 3182(2) | 113(2) |
| F(4)  | 8096(5)  | 2278(3) | 2797(2) | 97(1)  |
| N(4)  | 5680(6)  | 1064(3) | 0       | 32(1)  |
| C(21) | 4814(7)  | 275(4)  | 0       | 28(1)  |
| C(22) | 3703(10) | -735(5) | 0       | 50(2)  |
| N(5)  | 9485(11) | 8128(8) | 0       | 89(3)  |
| C(31) | 8398(10) | 7478(5) | 0       | 45(1)  |
| C(32) | 6943(8)  | 6650(4) | 0       | 38(1)  |

**Table C.3.** Bond lengths [Å] and angles [°] for Chisholm 1449.

---

|                   |            |
|-------------------|------------|
| Mo(1)-Mo(2)       | 2.1242(5)  |
| Mo(1)-N(3)        | 2.160(3)   |
| Mo(1)-N(1)        | 2.161(2)   |
| Mo(2)-O(1)        | 2.035(2)   |
| Mo(2)-N(2)        | 2.170(3)   |
| N(1)-C(6)         | 1.367(4)   |
| N(1)-C(2)         | 1.376(4)   |
| N(2)-C(7)         | 1.137(4)   |
| N(3)-C(9)         | 1.130(4)   |
| O(1)-C(6)         | 1.297(4)   |
| C(1)-C(2)         | 1.502(5)   |
| C(2)-C(3)         | 1.373(5)   |
| C(3)-C(4)         | 1.392(6)   |
| C(4)-C(5)         | 1.374(5)   |
| C(5)-C(6)         | 1.403(4)   |
| C(7)-C(8)         | 1.462(5)   |
| C(9)-C(10)        | 1.450(4)   |
| B(1)-F(1)         | 1.349(5)   |
| B(1)-F(3)         | 1.363(5)   |
| B(1)-F(2)         | 1.361(5)   |
| B(1)-F(4)         | 1.373(5)   |
| N(4)-C(21)        | 1.140(6)   |
| C(21)-C(22)       | 1.461(7)   |
| N(5)-C(31)        | 1.112(10)  |
| C(31)-C(32)       | 1.454(9)   |
| Mo(2)-Mo(1)-N(3)  | 102.54(7)  |
| Mo(2)-Mo(1)-N(3)* | 102.54(7)  |
| N(3)-Mo(1)-N(3)*  | 88.29(14)  |
| Mo(2)-Mo(1)-N(1)  | 90.43(7)   |
| N(3)-Mo(1)-N(1)   | 86.70(10)  |
| N(3)*-Mo(1)-N(1)  | 166.84(10) |
| Mo(2)-Mo(1)-N(1)* | 90.43(7)   |

Electronic Supplementary Information for Dalton Transactions  
This journal is © The Royal Society of Chemistry 2007

|                   |            |
|-------------------|------------|
| N(3)-Mo(1)-N(1)*  | 166.84(10) |
| N(3)*-Mo(1)-N(1)* | 86.70(10)  |
| N(1)-Mo(1)-N(1)*  | 95.53(13)  |
| O(1)-Mo(2)-O(1)*  | 91.47(13)  |
| O(1)-Mo(2)-Mo(1)  | 93.73(6)   |
| O(1)*-Mo(2)-Mo(1) | 93.73(6)   |
| O(1)-Mo(2)-N(2)*  | 164.25(9)  |
| O(1)*-Mo(2)-N(2)* | 89.58(10)  |
| Mo(1)-Mo(2)-N(2)* | 101.88(7)  |
| O(1)-Mo(2)-N(2)   | 89.58(10)  |
| O(1)*-Mo(2)-N(2)  | 164.25(9)  |
| Mo(1)-Mo(2)-N(2)  | 101.88(7)  |
| N(2)*-Mo(2)-N(2)  | 85.24(15)  |
| C(6)-N(1)-C(2)    | 118.2(3)   |
| C(6)-N(1)-Mo(1)   | 116.6(2)   |
| C(2)-N(1)-Mo(1)   | 125.1(2)   |
| C(7)-N(2)-Mo(2)   | 169.5(3)   |
| C(9)-N(3)-Mo(1)   | 178.3(3)   |
| C(6)-O(1)-Mo(2)   | 121.67(19) |
| C(3)-C(2)-N(1)    | 121.6(3)   |
| C(3)-C(2)-C(1)    | 120.4(3)   |
| N(1)-C(2)-C(1)    | 118.0(3)   |
| C(2)-C(3)-C(4)    | 120.1(3)   |
| C(5)-C(4)-C(3)    | 119.3(3)   |
| C(4)-C(5)-C(6)    | 119.2(3)   |
| O(1)-C(6)-N(1)    | 117.5(3)   |
| O(1)-C(6)-C(5)    | 120.9(3)   |
| N(1)-C(6)-C(5)    | 121.6(3)   |
| N(2)-C(7)-C(8)    | 178.5(4)   |
| N(3)-C(9)-C(10)   | 178.0(3)   |
| F(1)-B(1)-F(3)    | 111.4(4)   |
| F(1)-B(1)-F(2)    | 108.5(4)   |
| F(3)-B(1)-F(2)    | 107.9(4)   |
| F(1)-B(1)-F(4)    | 111.7(4)   |
| F(3)-B(1)-F(4)    | 109.2(4)   |

Electronic Supplementary Information for Dalton Transactions  
This journal is © The Royal Society of Chemistry 2007

|                  |          |
|------------------|----------|
| F(2)-B(1)-F(4)   | 108.0(4) |
| N(4)-C(21)-C(22) | 180.0(6) |
| N(5)-C(31)-C(32) | 178.6(9) |

---

Symmetry transformations used to generate equivalent atoms:

\* x,y,-z

**Table C.4.** Anisotropic displacement parameters ( $\text{\AA}^2 \times 10^3$ ) for Chisholm 1449. The anisotropic displacement factor exponent takes the form:  $-2\pi^2 [ h^2 a^* U^{11} + \dots + 2 h k a^* b^* U^{12} ]$

|       | $U^{11}$ | $U^{22}$ | $U^{33}$ | $U^{23}$ | $U^{13}$ | $U^{12}$ |
|-------|----------|----------|----------|----------|----------|----------|
| Mo(1) | 14(1)    | 21(1)    | 16(1)    | 0        | 0        | -1(1)    |
| Mo(2) | 18(1)    | 20(1)    | 16(1)    | 0        | 0        | -2(1)    |
| N(1)  | 20(1)    | 21(1)    | 18(1)    | -1(1)    | -1(1)    | -2(1)    |
| N(2)  | 26(1)    | 28(1)    | 22(1)    | 2(1)     | -1(1)    | -2(1)    |
| N(3)  | 20(1)    | 24(1)    | 21(1)    | -1(1)    | 1(1)     | 0(1)     |
| O(1)  | 20(1)    | 28(1)    | 21(1)    | -2(1)    | 3(1)     | -3(1)    |
| C(1)  | 30(2)    | 39(2)    | 49(2)    | -14(2)   | -1(2)    | -11(2)   |
| C(2)  | 25(2)    | 25(2)    | 24(1)    | -1(1)    | -4(1)    | -2(1)    |
| C(3)  | 38(2)    | 31(2)    | 27(2)    | -10(2)   | -7(2)    | 1(2)     |
| C(4)  | 43(2)    | 38(2)    | 22(2)    | -8(1)    | 1(1)     | 3(2)     |
| C(5)  | 30(2)    | 35(2)    | 22(2)    | -3(1)    | 7(1)     | 2(1)     |
| C(6)  | 22(2)    | 23(2)    | 18(1)    | 0(1)     | -1(1)    | 3(1)     |
| C(7)  | 28(2)    | 30(2)    | 26(2)    | -2(1)    | -5(1)    | -6(1)    |
| C(8)  | 59(2)    | 39(2)    | 33(2)    | 13(2)    | -8(2)    | -3(2)    |
| C(9)  | 19(1)    | 30(2)    | 21(1)    | -1(1)    | 2(2)     | -6(1)    |
| C(10) | 29(2)    | 37(2)    | 21(1)    | 11(1)    | 0(1)     | 0(2)     |
| B(1)  | 26(2)    | 33(2)    | 46(2)    | -6(2)    | 2(2)     | 0(2)     |
| F(1)  | 55(2)    | 130(3)   | 57(2)    | -18(2)   | 22(2)    | -4(2)    |
| F(3)  | 81(2)    | 74(2)    | 51(2)    | -17(1)   | -14(2)   | -6(2)    |
| F(2)  | 180(5)   | 42(2)    | 116(3)   | -17(2)   | 38(3)    | -24(2)   |
| F(4)  | 59(2)    | 138(3)   | 94(3)    | -29(2)   | -24(2)   | 47(2)    |
| N(4)  | 31(2)    | 32(2)    | 34(2)    | 0        | 0        | 3(2)     |
| C(21) | 26(2)    | 31(3)    | 25(2)    | 0        | 0        | 3(2)     |
| C(22) | 60(4)    | 47(3)    | 42(3)    | 0        | 0        | -21(3)   |
| N(5)  | 78(5)    | 127(6)   | 60(4)    | 0        | 0        | -56(5)   |
| C(31) | 43(3)    | 61(4)    | 31(2)    | 0        | 0        | -7(3)    |
| C(32) | 42(3)    | 39(3)    | 33(3)    | 0        | 0        | 4(2)     |

**Table C.5.** Hydrogen coordinates ( $\times 10^4$ ) and isotropic displacement parameters ( $\text{\AA}^2 \times 10^3$ ) for Chisholm 1449.

|        | x     | y     | z    | U(eq) |
|--------|-------|-------|------|-------|
| H(1A)  | 2840  | 5163  | 549  | 59    |
| H(1B)  | 3334  | 5570  | 1324 | 59    |
| H(1C)  | 2465  | 6422  | 773  | 59    |
| H(3)   | 368   | 6496  | 1936 | 39    |
| H(4)   | -2612 | 6007  | 2297 | 41    |
| H(5)   | -4084 | 4502  | 1769 | 35    |
| H(8A)  | -260  | -228  | 2086 | 65    |
| H(8B)  | 710   | -916  | 1472 | 65    |
| H(8C)  | -1481 | -951  | 1559 | 65    |
| H(10A) | 4824  | 1078  | 1625 | 43    |
| H(10B) | 4092  | 1948  | 2193 | 43    |
| H(10C) | 5879  | 2230  | 1735 | 43    |
| H(22A) | 4252  | -1279 | -319 | 75    |
| H(22B) | 2450  | -561  | -155 | 75    |
| H(22C) | 3662  | -1044 | 474  | 75    |
| H(32A) | 7452  | 5930  | 139  | 57    |
| H(32B) | 6415  | 6592  | -471 | 57    |
| H(32C) | 5980  | 6870  | 331  | 57    |

Table 6. Torsion angles [°] for Chisholm 1449.

---

|                         |             |
|-------------------------|-------------|
| N(3)-Mo(1)-Mo(2)-O(1)   | 88.62(9)    |
| N(3)*-Mo(1)-Mo(2)-O(1)  | 179.66(11)  |
| N(1)-Mo(1)-Mo(2)-O(1)   | 1.91(9)     |
| N(1)*-Mo(1)-Mo(2)-O(1)  | -93.63(10)  |
| N(3)-Mo(1)-Mo(2)-O(1)*  | -179.66(11) |
| N(3)*-Mo(1)-Mo(2)-O(1)* | -88.62(9)   |
| N(1)-Mo(1)-Mo(2)-O(1)*  | 93.63(10)   |
| N(1)*-Mo(1)-Mo(2)-O(1)* | -1.91(9)    |
| N(3)-Mo(1)-Mo(2)-N(2)*  | -89.31(11)  |
| N(3)*-Mo(1)-Mo(2)-N(2)* | 1.73(10)    |
| N(1)-Mo(1)-Mo(2)-N(2)*  | -176.02(10) |
| N(1)*-Mo(1)-Mo(2)-N(2)* | 88.44(10)   |
| N(3)-Mo(1)-Mo(2)-N(2)   | -1.73(10)   |
| N(3)*-Mo(1)-Mo(2)-N(2)  | 89.31(11)   |
| N(1)-Mo(1)-Mo(2)-N(2)   | -88.44(10)  |
| N(1)*-Mo(1)-Mo(2)-N(2)  | 176.02(10)  |
| Mo(2)-Mo(1)-N(1)-C(6)   | -1.3(2)     |
| N(3)-Mo(1)-N(1)-C(6)    | -103.9(2)   |
| N(3)*-Mo(1)-N(1)-C(6)   | -171.6(4)   |
| N(1)*-Mo(1)-N(1)-C(6)   | 89.2(2)     |
| Mo(2)-Mo(1)-N(1)-C(2)   | 175.1(2)    |
| N(3)-Mo(1)-N(1)-C(2)    | 72.6(2)     |
| N(3)*-Mo(1)-N(1)-C(2)   | 4.8(6)      |
| N(1)*-Mo(1)-N(1)-C(2)   | -94.4(2)    |
| O(1)-Mo(2)-N(2)-C(7)    | 96.0(15)    |
| O(1)*-Mo(2)-N(2)-C(7)   | 2.1(17)     |
| Mo(1)-Mo(2)-N(2)-C(7)   | -170.3(15)  |
| N(2)*-Mo(2)-N(2)-C(7)   | -69.1(15)   |
| Mo(2)-Mo(1)-N(3)-C(9)   | -139(9)     |
| N(3)*-Mo(1)-N(3)-C(9)   | 118(9)      |
| N(1)-Mo(1)-N(3)-C(9)    | -50(9)      |
| N(1)*-Mo(1)-N(3)-C(9)   | 51(9)       |
| O(1)*-Mo(2)-O(1)-C(6)   | -97.2(2)    |



Electronic Supplementary Information for Dalton Transactions  
This journal is © The Royal Society of Chemistry 2007

|                       |           |
|-----------------------|-----------|
| Mo(1)-Mo(2)-O(1)-C(6) | -3.4(2)   |
| N(2)*-Mo(2)-O(1)-C(6) | 169.2(3)  |
| N(2)-Mo(2)-O(1)-C(6)  | 98.5(2)   |
| C(6)-N(1)-C(2)-C(3)   | -2.2(5)   |
| Mo(1)-N(1)-C(2)-C(3)  | -178.6(2) |
| C(6)-N(1)-C(2)-C(1)   | 178.1(3)  |
| Mo(1)-N(1)-C(2)-C(1)  | 1.7(4)    |
| N(1)-C(2)-C(3)-C(4)   | 0.3(5)    |
| C(1)-C(2)-C(3)-C(4)   | -179.9(3) |
| C(2)-C(3)-C(4)-C(5)   | 1.6(5)    |
| C(3)-C(4)-C(5)-C(6)   | -1.7(5)   |
| Mo(2)-O(1)-C(6)-N(1)  | 2.9(4)    |
| Mo(2)-O(1)-C(6)-C(5)  | -176.7(2) |
| C(2)-N(1)-C(6)-O(1)   | -177.5(3) |
| Mo(1)-N(1)-C(6)-O(1)  | -0.8(3)   |
| C(2)-N(1)-C(6)-C(5)   | 2.2(4)    |
| Mo(1)-N(1)-C(6)-C(5)  | 178.9(2)  |
| C(4)-C(5)-C(6)-O(1)   | 179.4(3)  |
| C(4)-C(5)-C(6)-N(1)   | -0.3(5)   |
| Mo(2)-N(2)-C(7)-C(8)  | -2(17)    |
| Mo(1)-N(3)-C(9)-C(10) | 178(100)  |

---

Symmetry transformations used to generate equivalent atoms:

\* x,y,-z
